# Supplementary material for: Reducing Disparities Within Breast Cancer Care Among Hispanic Patients in a Safety-Net Community Hospital
Source: Preprints.org preprint supplement (doi:10.20944/preprints202409.0254.v1), 2024-09-05
Supplement: Supplementary file 1 [file Appendix A-1.pdf › New folder/Appendix A-1.pdf]

# Breast Surgery Options

|  | Lumpectomy | Mastectomy | Mastectomy<br>w/ prophylactic<br>contralateral mastectomy |
|--|------------|------------|-----------------------------------------------------------|
|--|------------|------------|-----------------------------------------------------------|

What will  
my breasts look like  
after surgery?

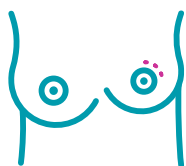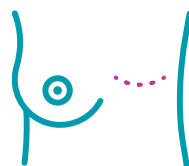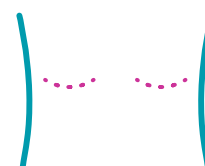

What if I get breast  
reconstruction?

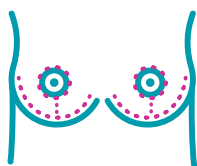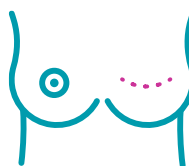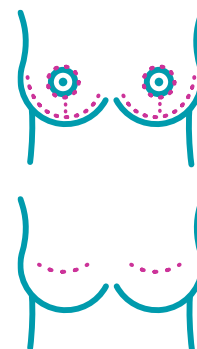

|  | Male Mastectomy | Male Mastectomy<br>w/ prophylactic contralateral mastectomy |
|--|-----------------|-------------------------------------------------------------|
|--|-----------------|-------------------------------------------------------------|

What will my breasts  
look like after surgery?

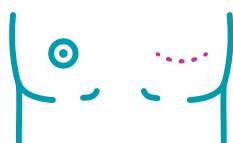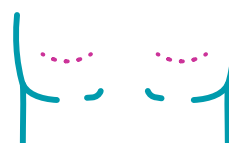

|                                                        | Lumpectomy                                                                                                                                | Mastectomy                                                                                                                                               | Mastectomy<br>w/ prophylactic<br>contralateral mastectomy                                                                                                   |
|--------------------------------------------------------|-------------------------------------------------------------------------------------------------------------------------------------------|----------------------------------------------------------------------------------------------------------------------------------------------------------|-------------------------------------------------------------------------------------------------------------------------------------------------------------|
| Will I need radiation?                                 | Yes                                                                                                                                       | Unlikely                                                                                                                                                 | Unlikely                                                                                                                                                    |
| What is recovery like?                                 | <ul style="list-style-type: none"> <li>• Small incision</li> <li>• Less painful (1-2 weeks)</li> <li>• Radiation after surgery</li> </ul> | <ul style="list-style-type: none"> <li>• Large incision</li> <li>• More painful (1-3 months)</li> <li>• Will likely have drain (2 weeks min.)</li> </ul> | <ul style="list-style-type: none"> <li>• Large incision x2</li> <li>• More painful (1-3 months)</li> <li>• Will likely have drain (2 weeks min.)</li> </ul> |
| What does mammogram screening look like after surgery? | Yearly screening                                                                                                                          | Yearly screening for contralateral breast                                                                                                                | No screening, but will need yearly physical exam screening                                                                                                  |
