# Supplementary material for: Reducing Disparities Within Breast Cancer Care Among Hispanic Patients in a Safety-Net Community Hospital
Source: Preprints.org preprint supplement (doi:10.20944/preprints202409.0254.v1), 2024-09-05
Supplement: Supplementary file 2 [file Appendix A-2.pdf › New folder/Appendix A-2.pdf]

# Breast Surgery Options

|                                                           | Tumorectomía                                                                        | Mastectomía                                                                           | Mastectomía<br>con mastectomía<br>contralateral profiláctica                         |
|-----------------------------------------------------------|-------------------------------------------------------------------------------------|---------------------------------------------------------------------------------------|--------------------------------------------------------------------------------------|
| ¿Cómo se verán<br>mis senos después<br>de la cirugía?     |    |      |   |
| ¿Qué pasa si<br>me hago una<br>reconstrucción<br>de seno? |   |     |  |
|                                                           | Mastectomía masculina                                                               | Mastectomía masculina<br>masculina con mastectomía<br>contralateral profiláctica      |                                                                                      |
| ¿Cómo se verán mis<br>senos después de la<br>cirugía?     |  |  |                                                                                      |

|                                                    | Tumorectomía                                                                                                                                              | Mastectomía                                                                                                                                                                           | Mastectomía<br>con mastectomía<br>contralateral profiláctica                                                                                                                               |
|----------------------------------------------------|-----------------------------------------------------------------------------------------------------------------------------------------------------------|---------------------------------------------------------------------------------------------------------------------------------------------------------------------------------------|--------------------------------------------------------------------------------------------------------------------------------------------------------------------------------------------|
| ¿Necesitaré radiación?                             | Sí                                                                                                                                                        | Es poco probable                                                                                                                                                                      | Es poco probable                                                                                                                                                                           |
| ¿Cómo será la recuperación?                        | <ul style="list-style-type: none"> <li>• incisión pequeña</li> <li>• menos dolorosa (1 a 2 semanas)</li> <li>• radiación después de la cirugía</li> </ul> | <ul style="list-style-type: none"> <li>• incisión grande</li> <li>• más dolorosa (1 a 3 meses)</li> <li>• es probable que tenga un tubo de drenaje (2 semanas como mínimo)</li> </ul> | <ul style="list-style-type: none"> <li>• 2 incisiones grandes</li> <li>• más dolorosa (1 a 3 meses)</li> <li>• es probable que tenga un tubo de drenaje (2 semanas como mínimo)</li> </ul> |
| ¿Cómo serán las mamografías después de la cirugía? | Mamografía de detección cada año                                                                                                                          | Al seno contralateral se le hace una mamografía de detección cada año                                                                                                                 | No se hace una mamografía de detección, pero necesitará un examen físico de revisión cada año                                                                                              |
