# Supplementary material for: Reducing Disparities Within Breast Cancer Care Among Hispanic Patients in a Safety-Net Community Hospital
Source: Preprints.org preprint supplement (doi:10.20944/preprints202409.0254.v1), 2024-09-05
Supplement: Supplementary file 3 [file Appendix B.pdf › New folder/Appendix B.pdf]

# Breast Surgery Clinic Surgical Options Questionnaire

**1. I had enough information to choose the surgery I wanted.**

- ☐ Had to call or schedule another appointment for more information
- ☐ Looked up information on own
- ☐ Did not need more information

**2. I needed an extra discussion with the surgeon in order to choose which surgery I wanted.**

- ☐ Had to make an additional appointment with breast surgeon
- ☐ Had to talk on the phone with breast surgeon
- ☐ Was able to decide without an extra discussion with my breast surgeon

**3. It was clear to me what my recovery was going to be like after surgery.**

- ☐ It was not at all clear to me what recovery would be like, and I had to call or schedule another appointment for more information
- ☐ It was not clear to me what recovery would be like, and I looked up information on my own
- ☐ It was clear to me what recovery would be like, and it did not turn out how I expected
- ☐ It was clear to me what recovery would be like, and it turned out how I expected

**4. I understood what it would look like for me to have reconstruction versus not having reconstruction.**

- ☐ I could not understand reconstruction at all, and had to call or schedule another appointment with breast surgeon for more information
- ☐ I could not understand reconstruction at all, and looked up information on my own
- ☐ I understood reconstruction, and it did not turn out how I expected
- ☐ I understood reconstruction, and it turned out how I expected

**5. I was able to clearly visualize what my breasts would look like after surgery.**

- ☐ I could not visualize what my breasts would look like at all, and had to call or schedule another appointment for more information
- ☐ I could not visualize what my breasts would look like at all, and looked up information on my own
- ☐ I could clearly visualize what my breasts would look like, and I was wrong
- ☐ I could clearly visualize what my breasts would look like, and I was correct

# Cuestionario de opciones de cirugía de la Clínica de Cirugía de Seno

**1. Conté con suficiente información para elegir la cirugía que quería.**

- ☐ Tuve que llamar o programar otra cita para obtener más información
- ☐ Busqué información por mi cuenta
- ☐ No necesité más información

**2. Necesité platicar con el/la cirujano(a) otra vez para elegir qué cirugía quería.**

- ☐ Tuve que hacer una cita más con el/la cirujano(a) de seno
- ☐ Tuve que hablar por teléfono con el/la cirujano(a) de seno
- ☐ Pude decidir sin platicar una vez más con mi cirujano(a) de seno

**3. Me quedó claro cómo iba a ser mi recuperación después de la cirugía.**

- ☐ No me quedó claro en absoluto cómo sería la recuperación, y tuve que llamar o programar otra cita para obtener más información
- ☐ No me quedó claro cómo sería la recuperación, y busqué información por mi cuenta
- ☐ Me quedó claro cómo sería la recuperación, y no resultó como esperaba
- ☐ Me quedó claro cómo sería la recuperación, y resultó como esperaba

**4. Entendí lo que implicaría para mí tener una reconstrucción en comparación con no tener una reconstrucción.**

- ☐ No pude entender la reconstrucción en absoluto, y tuve que llamar o programar otra cita con el/la cirujano(a) de seno para obtener más información
- ☐ No pude entender la reconstrucción en absoluto, y busqué información por mi cuenta
- ☐ Entendí la reconstrucción, y no resultó como esperaba
- ☐ Entendí la reconstrucción, y resultó como esperaba

**5. Pude visualizar claramente cómo se verían mis senos después de la cirugía.**

- ☐ No pude visualizar en absoluto cómo se verían mis senos, y tuve que llamar o programar otra cita para obtener más información
- ☐ No pude visualizar en absoluto cómo se verían mis senos, y busqué información por mi cuenta
- ☐ Pude visualizar claramente cómo se verían mis senos, y estaba equivocado(a)
- ☐ Pude visualizar claramente cómo se verían mis senos, y estaba en lo correcto
